# Supplementary material
Source: publisher figshare collection journal article supplement (https://acs.figshare.com/ndownloader/files/3919579)
Supplement: Supplementary file 1 [file 3919579]

# Supporting Information (SI)

## Uniform Graphitic Carbon Nitride Nanorod for Efficient Photocatalytic Hydrogen Evolution and Sustained Photoenzymatic Catalysis

*Jian Liu<sup>\*†</sup>, Jianhui Huang<sup>\*‡</sup>, Han Zhou<sup>†#</sup> and Markus Antonietti<sup>†</sup>*

<sup>†</sup>Department of Colloid Chemistry, Max Planck Institute of Colloids and Interfaces, 14424 Potsdam, Germany

<sup>‡</sup>College of Environmental and Biological Engineering, Putian University, Putian 351100, P.R.China

<sup>#</sup>State Key Lab of Metal Matrix Composites, Shanghai Jiaotong University, Shanghai, 200240, P.R.China

E-Mail: [Jian.Liu@mpikg.mpg.de](mailto:Jian.Liu@mpikg.mpg.de); [owenhuang95@163.com](mailto:owenhuang95@163.com)

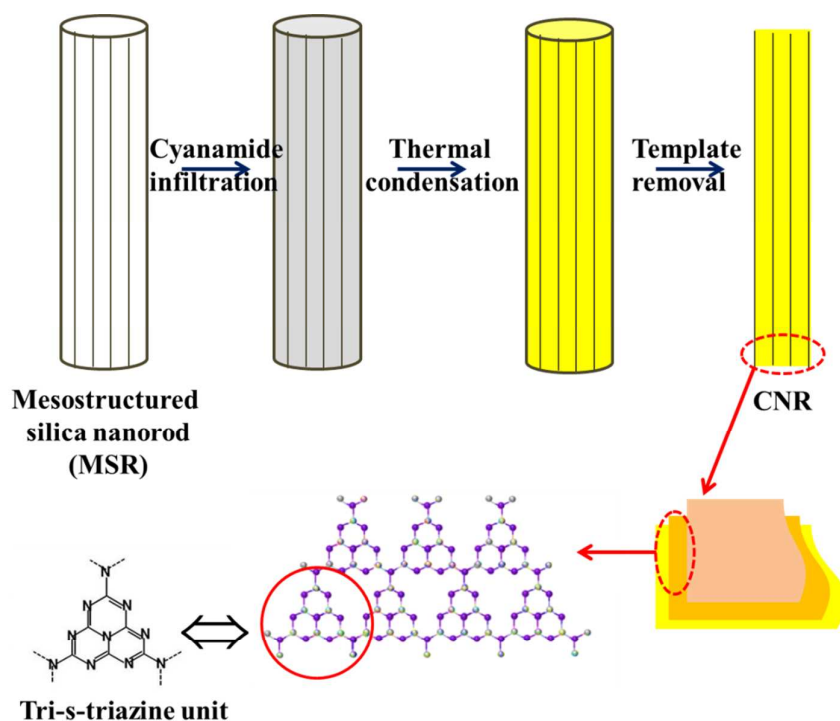

**Scheme S1.** A schematic diagram of the synthesis of CNR templated from mesostructured silica nanorod (MSR) using cyanamide as precursor. The obtained CNR features layered carbon nitride sheet as building blocks with tris-s-triazine basic unit.

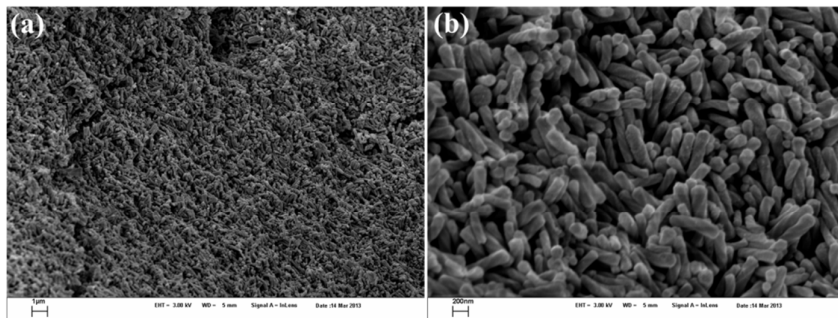

**Figure S1.** SEM images of MSR.

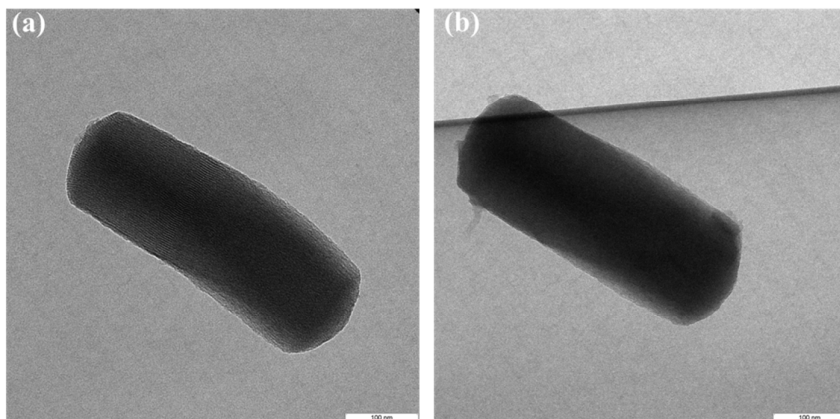

**Figure S2.** TEM images of a single MSR (a) and carbon nitride/MSR composite (b).

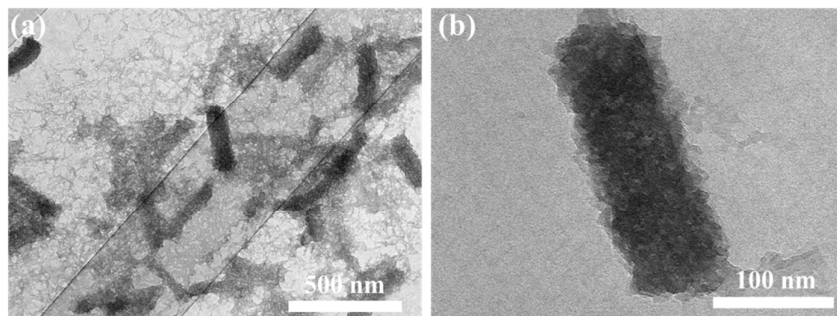

**Figure S3.** TEM images of the carbon nitride nanorod templated by MSR by aqueous infiltration method. (a), large are view; (b) magnified view.

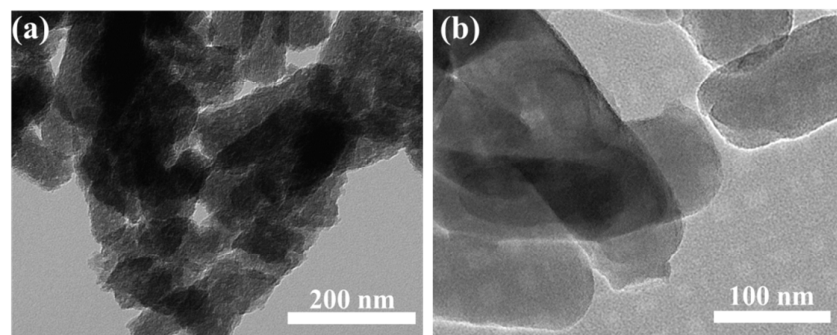

**Figure S4.** TEM of etched MSR (a) and the templated e-CNR, also featuring the non-porous properties.

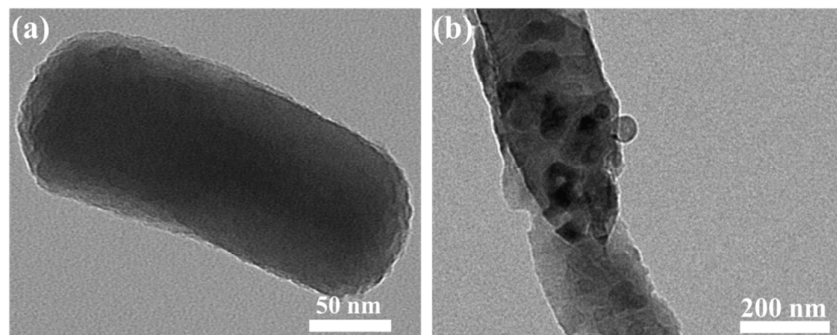

**Figure S5.** TEM images of original CNR (a) and after air exfoliation (b). Air exfoliation program: 500 °C, 4h.

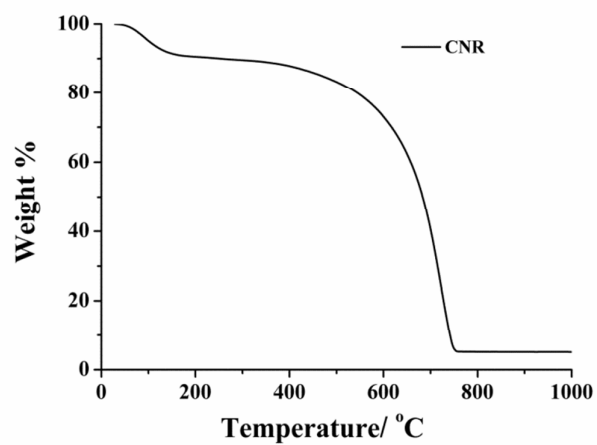

**Figure S6.** TGA curve of CNR.

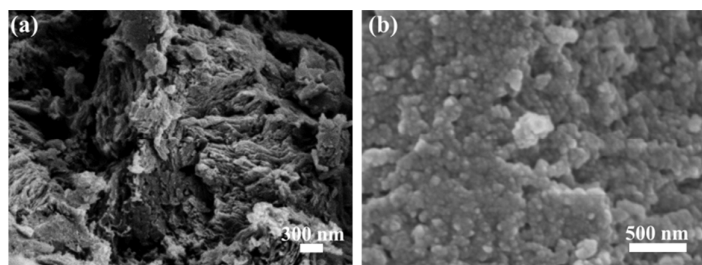

**Figure S7.** SEM images of the control samples, including Bulk CN (a) and Mesoporous CN (b).

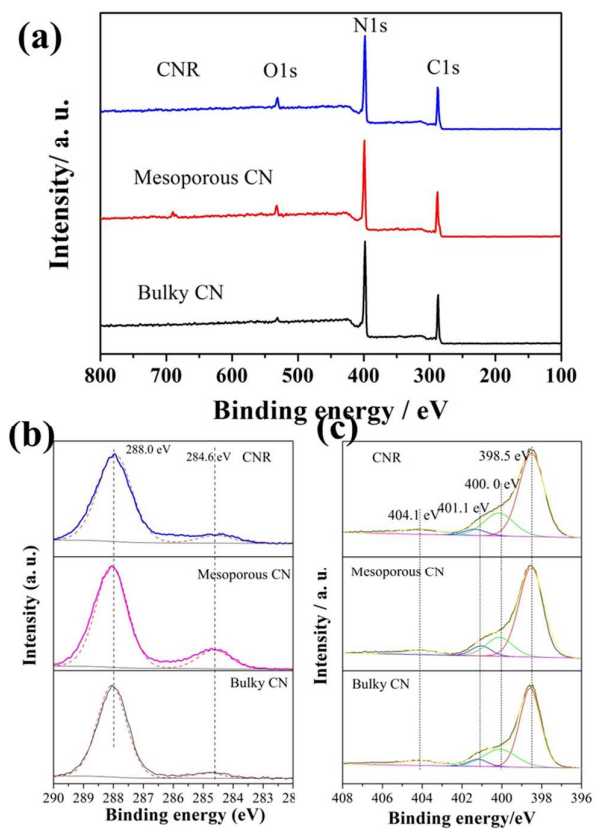

**Figure S8.** XPS survey (a) and the corresponding high resolution analysis (b) of CNR, mesoporous CN and bulk CN, respectively.

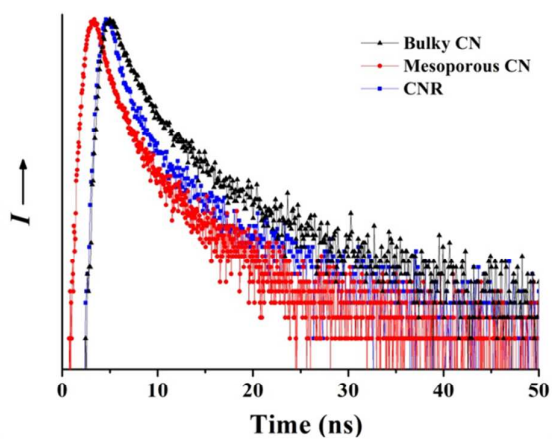

|                      | Components | Lifetime (ns) | Rel%  |
|----------------------|------------|---------------|-------|
| <b>Bulky CN</b>      | $\tau_1$   | 1.5889        | 63.86 |
|                      | $\tau_2$   | 9.0553        | 36.14 |
| <b>Mesoporous CN</b> | $\tau_1$   | 0.8684        | 68.82 |
|                      | $\tau_2$   | 5.1380        | 31.18 |
| <b>CNR</b>           | $\tau_1$   | 0.7091        | 66.26 |
|                      | $\tau_2$   | 6.8019        | 33.74 |

**Figure S9.** Time-resolved photoluminescence of bulky CN, mesoporous CN and CNR, respectively.

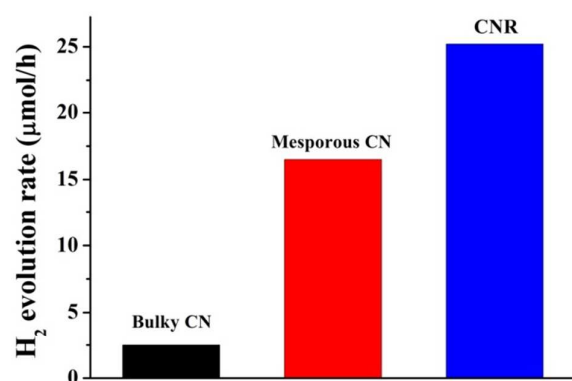

**Figure S10.** Photocatalytic H<sub>2</sub> evolution for CNR, mesoporous CN and bulk CN under visible light irradiation.

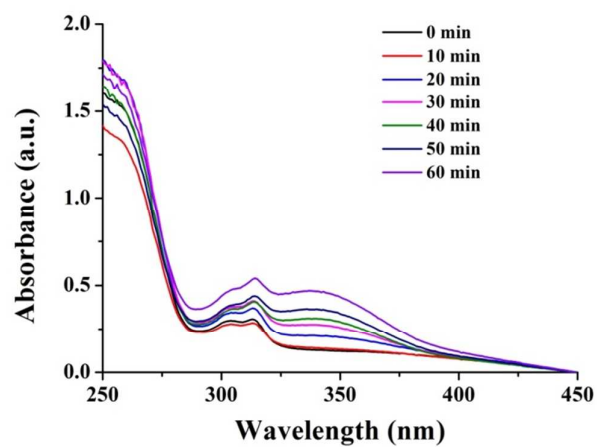

**Figure S11.** Spectral measurements of NADH concentration in mediator involved reaction solution by CNR photocatalysis.  $\beta$ -NAD<sup>+</sup>, 1 mM; **M**, 0.25 mM; TEOA, 15 w/v%; PBS buffer, 0.1 M, pH=8; CNMS, 3 mg.

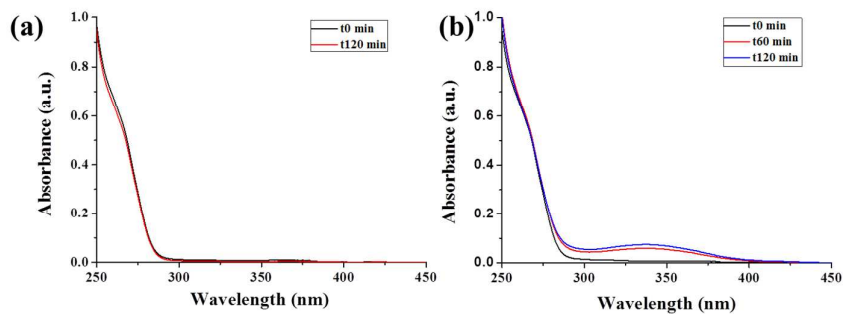

**Figure S12.** The control experiments without carbon nitride involved (a) and without [Cp\*Rh(bpy)(H)]<sup>+</sup> (b), respectively.

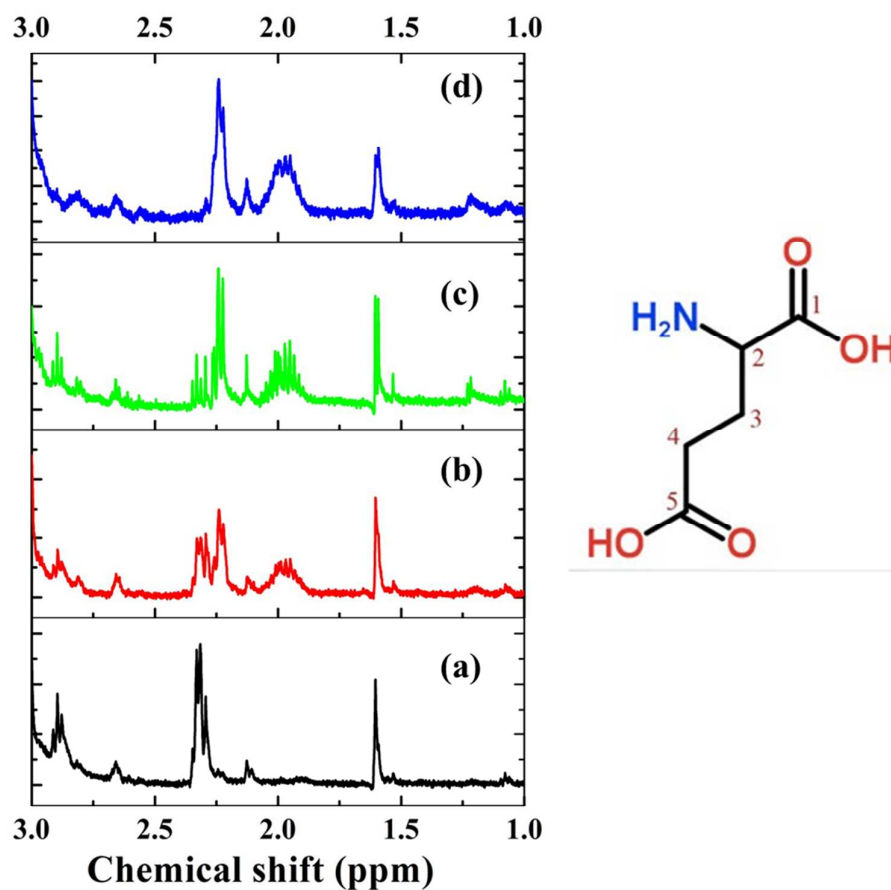

**Figure S13.** Partial HNMR spectra for the reaction between in-situ regenerated NADH and  $\alpha$ -ketoglutarate in the presence of L-glutamate dehydrogenase: (a) before the reaction; (b) after 3h enzymatic reaction; (c) after 6 h enzymatic reaction; (d) after 8 h enzymatic reaction. The conversion ratio was calculated based on the signal of the 3<sup>rd</sup> carbon in L-glutamate with the multiplet is observed between 1.9 and 2.18 ppm.
